# Supplementary material
Source: MDPI journal article supplement (https://www.mdpi.com/2076-3417/12/3/1649)
Supplement: s1 [file s1 › applsci-1487046-supplementary.pdf]

# **Energy-efficient CuO/TiO<sub>2</sub>@GCN cellulose acetate-based membrane for concurrent filtration and photodegradation of ketoprofen in drinking and groundwater**

Lethula E. Mofokeng <sup>1,2</sup>, Lerato Hlekelele <sup>1</sup>, John Moma <sup>2</sup>, Zikhona N. Tetana <sup>3,4</sup>, Vongani P. Chauke <sup>1\*</sup>

<sup>1</sup> Council for scientific and industrial research,

Meiring Naude Road, Brummeria, Pretoria, 0184, South Africa.

<sup>2</sup> Molecular Sciences Institute, School of Chemistry, University of the Witwatersrand, Private Bag X3, Johannesburg, 2050, South Africa.

<sup>3</sup> DST-NRF Centre of Excellence in Strong Materials, University of the Witwatersrand, Johannesburg, 2050, South Africa.

<sup>4</sup> Microscopy and Microanalysis Unit, University of the Witwatersrand, Private Bag 3, 2050, Johannesburg, South Africa

\*Correspondence email: VChauke@csir.co.za

## **S1**

### **Preparation of TiO<sub>2</sub> nanoparticles.**

Typically, TTIP (3mL) was added into 2-propanol (50mL) while magnetically stirring for 10 min to form a uniform solution. Concentrated HNO<sub>3</sub> (0.15 mL) was added into the TTIP solution while stirring continuously for further a 30 min to assist hydrolysis of the TTIP precursors. Tri-potassium citrate (1 mmol) was dissolved separately in deionized water (10 mL) and added into a TTIP mixture. The mixture was magnetically stirred for 4 h at room temperature and aged for 12 h to allow the growth of the crystals. After gelation, the obtained gel was centrifuged, washed with deionized water and ethanol several times, and dried at 85 °C for 12 h in a vacuum oven. The dried product was ground into fine powders using pestle and mortar and finally calcined in a muffle furnace at 450 °C for 4 h in the air at a rate of 10 °C/min to obtain whitish TiO<sub>2</sub>.

## **S2**

### **Preparation of CuO/TiO<sub>2</sub> photocatalysts**

CuO doped TiO<sub>2</sub> nanoparticles were fabricated using the wet impregnation method adopted in the previous literature with minor modifications [44]. Typically, CuSO<sub>4</sub>·5H<sub>2</sub>O weights (0.1 g, 0.2 g, and 0.4 g) were dissolved in deionized water (100 mL) and TiO<sub>2</sub> (1 g) was added. The Ti-Cu mixtures were stirred magnetically for 4 h and heated for 2 h at 75 °C using a hot plate. The obtained particles were centrifuged, washed several times with deionized water and ethanol to remove impurities. The obtained particles were dried in a vacuum oven for 12 h at 85 °C. The dried particles were ground using pestle and mortar into fine powders. Thereafter, the particles were calcined for 4 h in the air at 450 °C at the rate of 10 °C/min using a muffle furnace to obtain CuO/TiO<sub>2</sub>.

### S3

#### **Preparation of graphitic carbon nitride**

Typically, 6 g of melamine was placed in a covered ceramic crucible to avoid melamine being combusted into the air and heated in a muffle furnace at 550 °C for 4 h at the rate of 10 °C/min. After cooling down at room temperature, the yellowish bulk graphitic carbon nitride was ground with pestle and mortar to fine yellowish powders. Finally, 0.5 g of bulk graphitic carbon nitride was heated further using an open ceramic crucible to form thermally exfoliated sheets of graphitic carbon nitride at 525 °C for 2 h at the rate of 3 °C/min in a muffle furnace. After calcination cooled down, the exfoliated graphitic carbon nitride sheets were denoted as GCN.

### S4

#### **Preparation of cellulose acetate membranes**

Typically, 15 g of CA powder was dissolved in DMSO (85 mL) at 60 °C for 6 h to form a homogenous casting solution. Thereafter, the mixture was degassed for 12 h and then, scattered on the glass plate using a casting knife (150 µm) and immersed instantly in a deionized water bath to remove DMSO residues. The wet membranes were retained and transferred into a freshwater bath filled with deionized water for 24 h to ensure complete phase separation. The as-prepared membranes were taped on the glass plate and dried at room temperature.

### S5

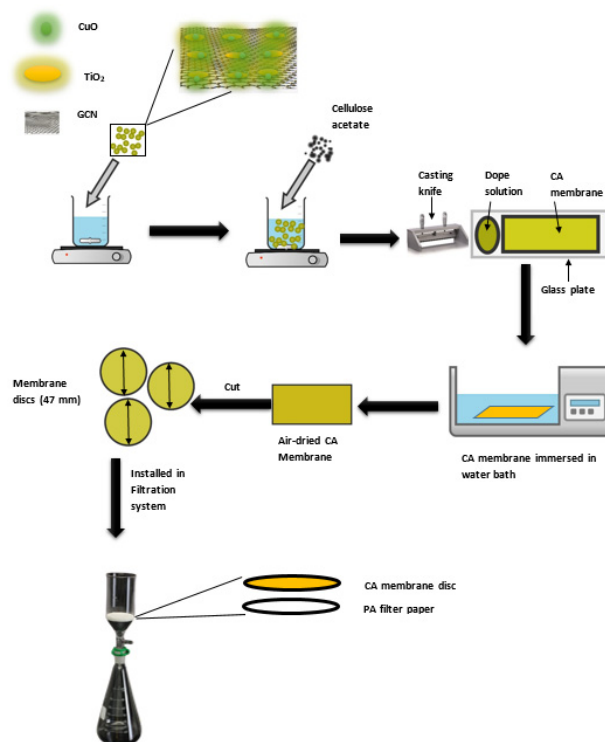

**Figure S1.** Systematic illustration for the fabrication of CA-based membranes embedded with ternary 1% CuO/TiO<sub>2</sub>@GCN (1:9) nanocomposite.

S6

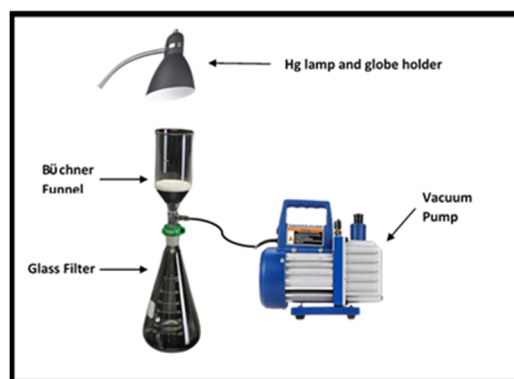

**Figure S2.** Filtration setup equipped with a medium power mercury lamp (165W) and vacuum pump (100W).

S7

**TEM and SEM analysis of 1% CuO/TiO<sub>2</sub>@GCN nanocomposite**

**Figure S3** are the (a) TEM and (b) SEM images of the photocatalyst, i.e. 1% CuO/TiO<sub>2</sub>. Here, it was observed that the nanocomposite consists of granular like nanoparticles that are agglomerated together. The size of the 1% CuO/TiO<sub>2</sub> nanocomposites was determined by Sherrer's equation and were found to be 18 nm. The EDX spectrum of 1% CuO/TiO<sub>2</sub> nanocomposite confirmed that the material consists Cu, O and Ti. **Figure S3d** exhibits the clustered TEM image of 1% CuO/TiO<sub>2</sub>@GCN (1:9) nanocomposite with the tail marks of CuO/TiO<sub>2</sub> spread randomly along with the GCN sheets. SEM image in **Figure S3e** shows 1% CuO/TiO<sub>2</sub> nanoparticles on the surfaces of GCN. SEM elemental mapping in **Figure S3(f, g, h and i)** provided evidence of the presence of key elemental compositions in 1% CuO/TiO<sub>2</sub>@GCN (1:9) nanocomposite such as Cu, Ti, O, and C, which emanated from CuO/TiO<sub>2</sub> and GCN, respectively. EDX spectrum in **Figure S3j** confirmed that elemental components, Cu, Ti, and O, which were attributed to CuO/TiO<sub>2</sub> were supported successfully on the surfaces of GCN.

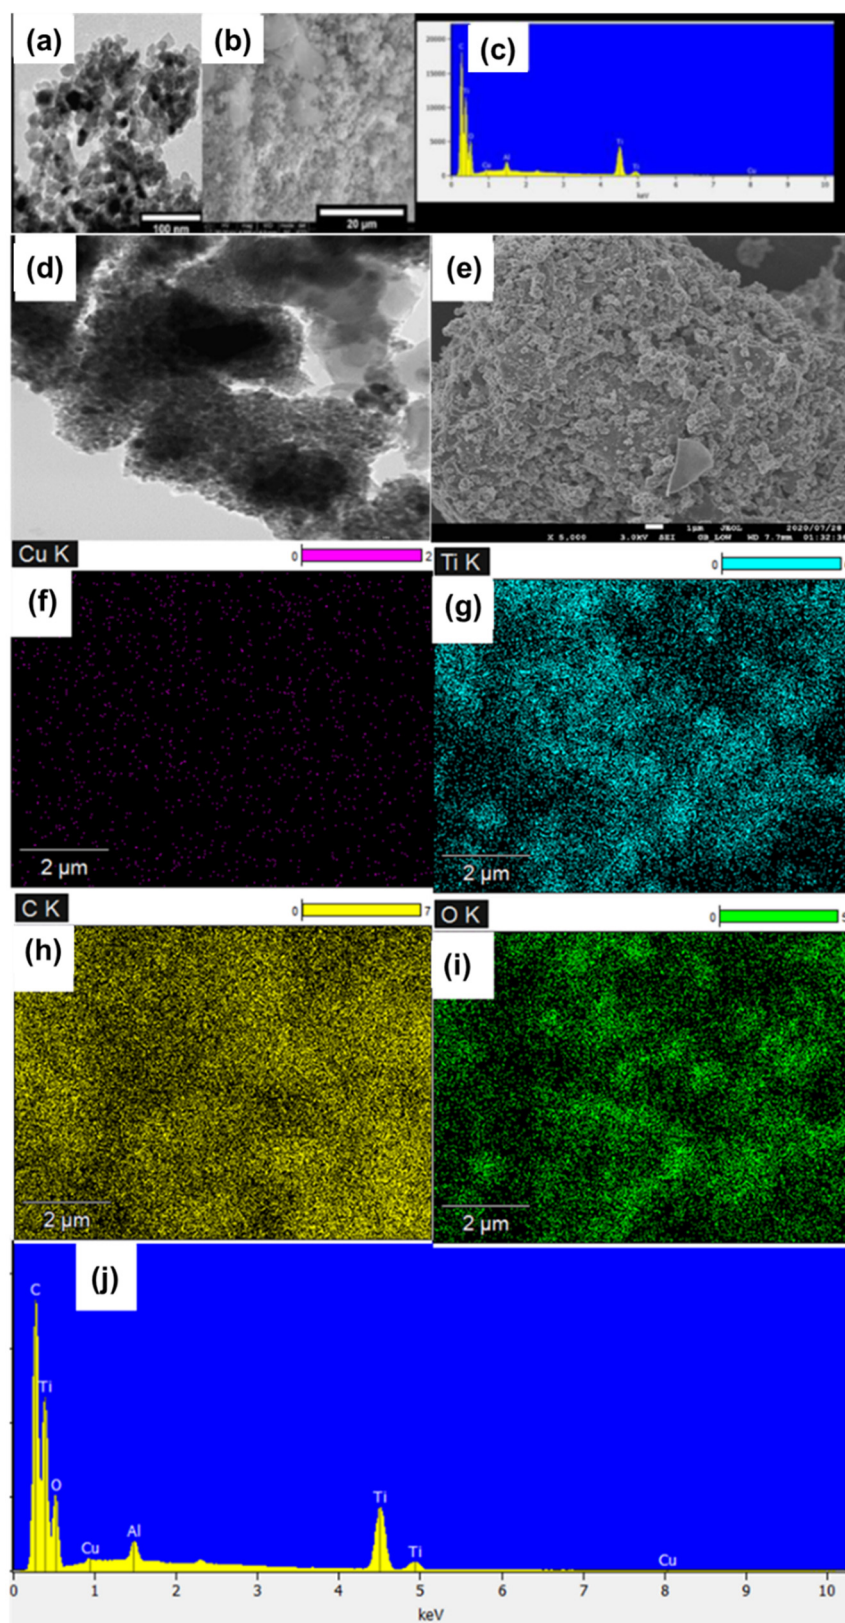

**Figure S3.** TEM images of (a) 1% CuO/TiO<sub>2</sub> and (d) 1% CuO/TiO<sub>2</sub>@GCN (1:9) nanocomposite, SEM images of (b) TiO<sub>2</sub> and (e) of 1% CuO/TiO<sub>2</sub>@GCN (1:9) nanocomposite, EDX spectrum of (c) 1% CuO/TiO<sub>2</sub>@GCN (1:9) nanocomposite and SEM elemental mapping of (f) Cu, (g) Ti, (h) C, and (i) O.

### Optical properties

The optical properties of a pure  $\text{TiO}_2$ , 1%  $\text{CuO}/\text{TiO}_2@\text{GCN}$  (1:9) nanocomposite was analyzed using UV/Vis in a range from 200 to 1100 nm. **Figure S4a** shows a hump-shaped  $\text{TiO}_2$  peak appearing between 300 and 375 nm corresponding to the bandgap of 3.2 eV (**Figure S4b**). The impregnation of CuO onto  $\text{TiO}_2$  embedded on GCN altered the absorption characteristics by showing broadened peaks extending into visible range wavelengths in **Figure S4a** with the estimated bandgap of 1.78 eV as observed in **Figure S4b**. This shifting of the absorption band of 1%  $\text{CuO}/\text{TiO}_2@\text{GCN}$  (1:9) was ascribed to the movement of charges from the valence band of CuO to the conduction band. Moreover, the d-d transitions of the  $\text{Cu}^{2+}$  ions tend to extend the absorption system of 1%  $\text{CuO}/\text{TiO}_2/\text{GCN}$  into higher wavelengths compared to undoped  $\text{TiO}_2$  [1].

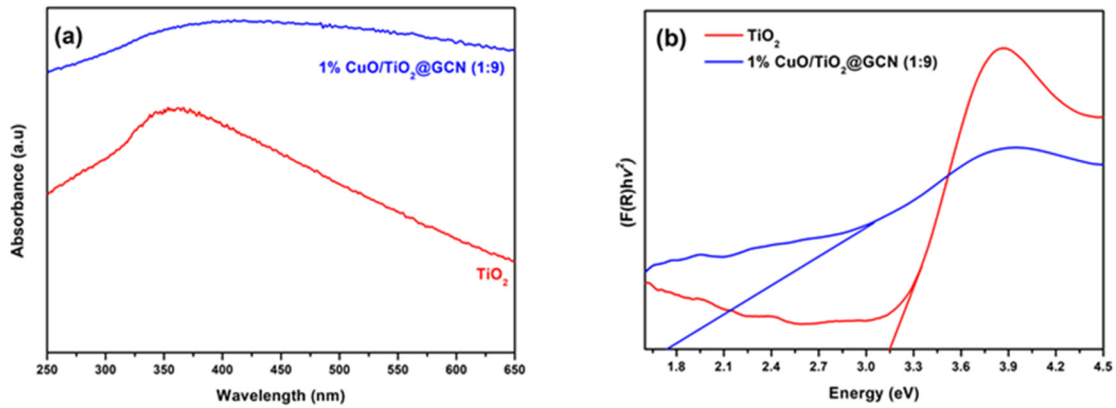

**Figure S4.** UV/Vis spectra of (a) unmodified  $\text{TiO}_2$  and 1%  $\text{CuO}/\text{TiO}_2@\text{GCN}$  (1:9) nanocomposite and (b) their extrapolated energy bandgaps based on Kubelka-Munk method.

### Membrane properties

The as-prepared membranes porosity ( $\varepsilon$ , %) was evaluated using the gravimetric method [2–4]. The weight of the membranes was utilized indirectly to predict the porosity of the as-prepared membranes using the **equation (S1)**.

$$\varepsilon (\%) = \left( \frac{\frac{(W_{wet} - W_{dry})}{\rho_w}}{\left( \frac{W_{wet} - W_{dry}}{\rho_w} + \frac{W_{dry}}{\rho_{CA}} \right)} \right) \times 100 \quad (\text{S1})$$

where  $\varepsilon$  represents the porosity in percentage (%),  $\rho_w$  and  $\rho_{CA}$  are densities of water (1 g/cm<sup>3</sup>) and CA (1.5 g/cm<sup>3</sup>), respectively,  $W_{wet}$  and  $W_{dry}$  represent the weight of the wet and dried membrane.

The shrinkage ratio was investigated by cutting the as-prepared membranes into a pre-determined area (17.35 cm<sup>2</sup>) with a known length and thickness which were measured before and after dipping in deionized water for 24 h. The shrinkage of the membranes was calculated using **equation (S2)**:

$$Shrinkage (\%) = 1 - \left( \frac{D_{dry} - T_{dry}}{D_{wet} - T_{wet}} \right) \times 100 \quad (S2)$$

where  $D_{dry}$  and  $D_{wet}$  represent the diameter of the dry and wet membranes, respectively, and  $T_{dry}$  and  $T_{wet}$  represent the thickness of the dry and wet membranes, respectively.

The determination of the pore volume was evaluated using water uptake of the membranes by immersing dry membrane discs (diameter = 47 mm) in deionized water for 24 h. The wet membrane discs were wiped with blotter paper and weighed immediately. To determine the dry weight of the membranes, wet membranes were dried in an electric oven for 24 h at 75 °C and weighed thereafter [5,6]. The water uptake was calculated using **equation (S3)**:

$$Water\ uptake (\%) = \frac{W_{wet} - W_{dry}}{W_{wet}} \quad (S3)$$

where  $W_{dry}$  and  $W_{wet}$  represent a dry and wet weight of the membrane disc, respectively.

These measurements were conducted as the porosity and thickness of the membrane in the presence of water tend to increase membrane swelling. An increase in porosity of the membrane signifies that there is high volume of pores per total volume of the membrane [7], hence, the membranes with porosity (%) over 80% are desired [8,9]. Moreover, porous photocatalytic membranes tend to exhibit high porosity due to their excess pore structures. Shrinkage ratio is performed by measuring wet and dry membranes thickness and length. After drying membranes tend to shrink and thickness and length of the membrane is reduced. Reports suggested that lower shrinkage ratio below 20-25% are desired. The filtration process of high shrinkage ratio hinders water permeation flux and the rejection of the contaminant, by squeezing or blocking the pore passages [9]

## S10

### Evaluation of the efficiency of the photocatalytic membrane

The photodegradation efficiency (PDE) of KP in solution were calculated using **equation (S4)**:

$$\text{PDE (\%)} = (A_o - A_t)/A_o \times 100\% = (C_o - C_t)/C_o \times 100\% \quad (\text{S4})$$

where  $C_o$  and  $A_o$  are initial concentration and absorbance at  $t = 0$  of the feed (KP), respectively.  $C_t$  and  $A_t$  are the concentration and absorbance at a certain time ( $t$ ) of the filtrate solution, respectively. The initial concentration of 10 mg/L KP was utilized as the feed.

## S11

### Electrical energy consumption

Electrical energy consumption ( $E_{EC}$ ) was calculated using **equation (S5)**:

$$\text{Electrical energy consumption (} E_{EC} \text{)} = (P \times t)/(60 \times V \times k) \quad (\text{S5})$$

where  $P$  denotes the electrical power (kW),  $t$  represents the reaction time (h) and  $V$  is the volume ( $\text{m}^3$ ), and  $k$  denotes the rate constant ( $\text{min}^{-1}$ ).

## S12

**Table S1.** The water quality characteristics of the different water matrixes used in this work

| Characteristics               | Water type      |                |             |
|-------------------------------|-----------------|----------------|-------------|
|                               | Distilled water | Drinking water | Groundwater |
| TOC, ppm                      | 0.05            | 0.71           | 0.77        |
| Total hardness (mg)           | 72              | 252            | 254         |
| pH                            | 5.8             | 7.7            | 7.9         |
| UV (254 nm)                   | 0               | 0.06           | 0.07        |
| Conductivity $\mu\text{S/cm}$ | 0.9             | 756            | 820         |
| pH                            | 5.9             | 7.8            | 7.9         |

S13

### FTIR analyses

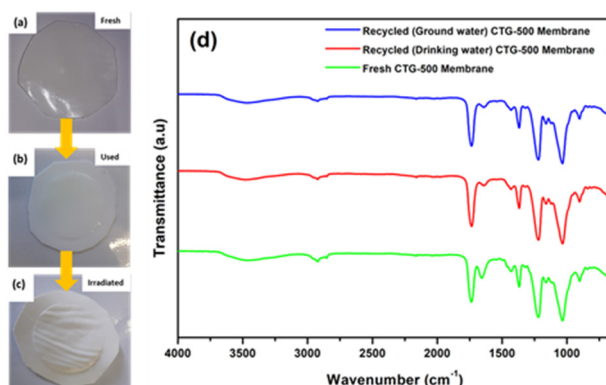

**Figure S5.** (a, b, and c) Series of steps for recycling the membranes and (d) ATR-FTR spectra of fresh CTG-500 membrane and after several cycles.

S14

### Proposed degradation pathway of KP

The photodegraded fragments and intermediates were determined based on the measured mass-to-charge ( $m/z$ ) ratio retrieved from LabSolutions software (Shimadzu, Japan). The uncatalyzed and photodegraded KP chromatograms at 0 and 5 h are presented in **Figure 13 (a and b)**, respectively. The uncatalyzed KP exhibited a single fragment at the retention time ( $R_t$ ) of 3.094 min. The photodegraded KP using CTG-500 photocatalytic membrane showed 5 major fragments on the chromatogram including the parental peak appearing at  $R_t = 3.088$  min. The other four fragments appeared at  $R_t = 1.534, 1.733, 2.933,$  and  $3.675$  min.

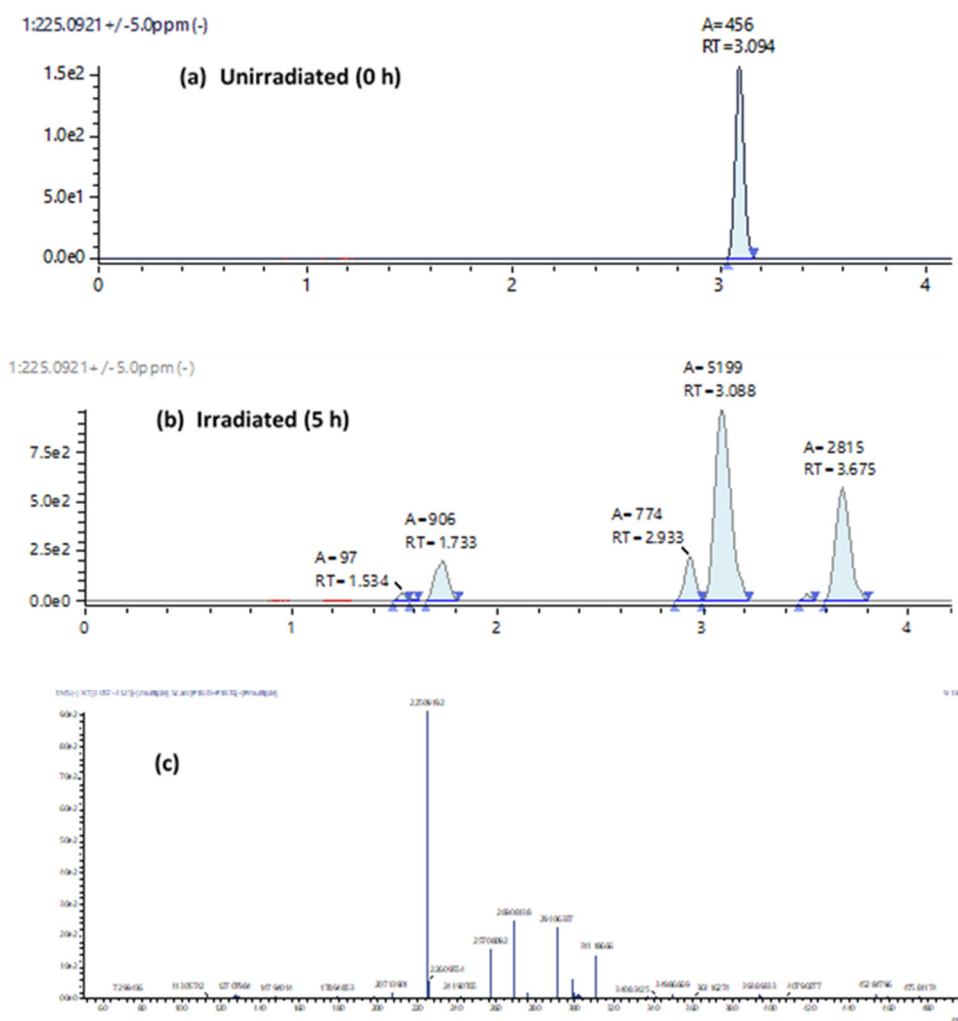

**Figure S6.** Chromatograms of (a) uncatalyzed and (b) photodegraded KP after 5 h; (c) mass spectrum for a peak at retention time 3.09 min.

The identification of the by-products was determined from the mass spectra analysis (Figure 13c). Figure 14 shows the proposed photodegradation pathway with the main by-products identified in Table 4. The major by-products which were identified on the mass spectra include (3-ethylphenyl)(phenyl)methanone ( $m/z = 209$ ), [3-(1-hydroxyethyl)phenyl](phenyl)methanone ( $m/z = 240$ ), 1-(3-benzolphenyl)ethan-1-one (224), 1-{3-[hydroxyl(phenyl)methyl]phenyl}ethan-1-ol (241) and [3-(1-hydroperoxyethyl)phenyl](phenyl)methanone (242) [10]. Upon visible light irradiation on the solution containing KP, under acidic media, KP is deprotonated to form intermediate (A) and rapidly converted into the intersystem crossing (ISC) to generate photoexcited triplet KP state ( $^3\text{KP}$ ) as shown on intermediate (B) (Figure 14). The formation of the by-product (D) arose

from the decarboxylation of triplet state KP, forming carbanion (C) and subsequent protonation formed (3-ethylphenyl)(phenyl)methanone [11].

Biradical KP intermediate on carbanion and benzophenone can interact with dissolved molecular O<sub>2</sub> and further protonation on the peroxy group would form a stable by-product (G). Further photoexcitation on (E) followed by the removal of water yield biradical and ISC KP, further molecular rearrangement produces a stable by-product (F). The elimination of water on the peroxy group (G) and alpha-carbon forms anionic oxygen, further protonation on the oxygen group from the protons in the solution forms a hydroxyl group (E) [12].

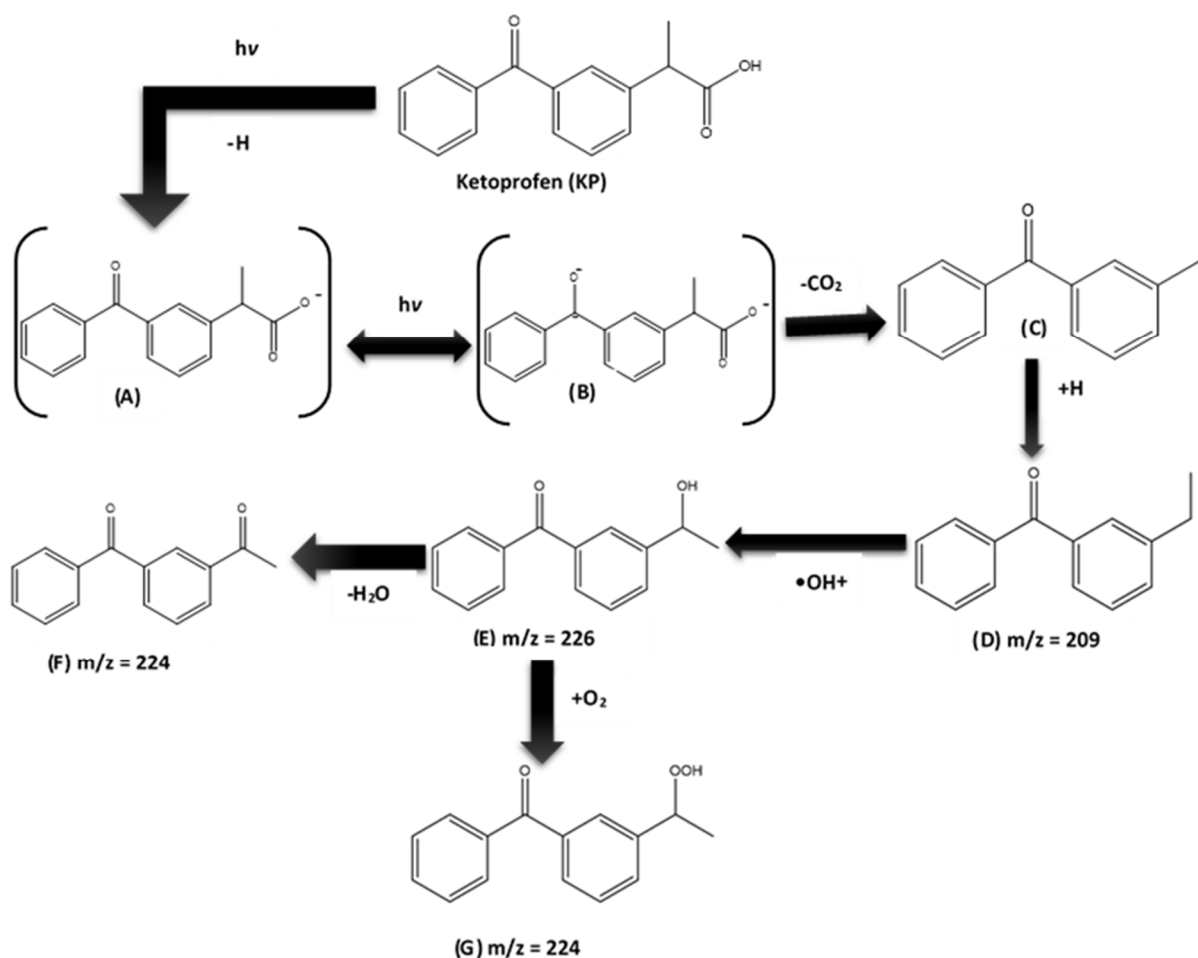

**Figure S7.** Proposed photodegradation pathway and the intermediates of KP.

## References

- [1] Q. Shi, G. Ping, X. Wang, H. Xu, J. Li, J. Cui, H. Abroshan, H. Ding, G. Li, CuO/TiO<sub>2</sub> heterojunction composites: an efficient photocatalyst for selective oxidation of methanol to methyl formate, *Journal of Materials Chemistry A*. 7 (2019) 2253–2260.
- [2] V. Vatanpour, S. Faghani, R. Keyikoglu, A. Khataee, Enhancing the permeability and antifouling properties of cellulose acetate ultrafiltration membrane by incorporation of ZnO@ graphitic carbon nitride nanocomposite, *Carbohydrate Polymers*. 256 (2021) 117413.
- [3] W. Li, B. Li, M. Meng, Y. Cui, Y. Wu, Y. Zhang, H. Dong, Y. Feng, Bimetallic Au/Ag decorated TiO<sub>2</sub> nanocomposite membrane for enhanced photocatalytic degradation of tetracycline and bactericidal efficiency, *Applied Surface Science*. 487 (2019) 1008–1017.
- [4] M.A. Mohamed, W.N.W. Salleh, J. Jaafar, A.F. Ismail, M. Abd Mutalib, N.A.A. Sani, S. Asri, C.S. Ong, Physicochemical characteristic of regenerated cellulose/N-doped TiO<sub>2</sub> nanocomposite membrane fabricated from recycled newspaper with photocatalytic activity under UV and visible light irradiation, *Chemical Engineering Journal*. 284 (2016) 202–215.
- [5] S.D. Neelapala, A.K. Nair, P.E. JagadeeshBabu, Synthesis and characterisation of TiO<sub>2</sub> nanofibre/cellulose acetate nanocomposite ultrafiltration membrane, *Journal of Experimental Nanoscience*. 12 (2017) 152–165.
- [6] R. Abedini, S.M. Mousavi, R. Aminzadeh, A novel cellulose acetate (CA) membrane using TiO<sub>2</sub> nanoparticles: preparation, characterization and permeation study, *Desalination*. 277 (2011) 40–45.
- [7] P.G. Ingole, K.H. Kim, C.H. Park, W.K. Choi, H.K. Lee, Preparation, modification and characterization of polymeric hollow fiber membranes for pressure-retarded osmosis, *RSC Advances*. 4 (2014) 51430–51439.
- [8] Y.H. Cho, J. Han, S. Han, M.D. Guiver, H.B. Park, Polyamide thin-film composite membranes based on carboxylated polysulfone microporous support membranes for forward osmosis, *Journal of Membrane Science*. 445 (2013) 220–227.
- [9] L.A. Shah, T. Malik, M. Siddiq, A. Haleem, M. Sayed, A. Naeem, TiO<sub>2</sub> nanotubes doped poly (vinylidene fluoride) polymer membranes (PVDF/TNT) for efficient photocatalytic degradation of brilliant green dye, *Journal of Environmental Chemical Engineering*. 7 (2019) 103291.
- [10] S. Miao, H. Zhang, S. Cui, J. Yang, Improved photocatalytic degradation of ketoprofen by Pt/MIL-125 (Ti)/Ag with synergetic effect of Pt-MOF and MOF-Ag double interfaces: Mechanism and degradation pathway, *Chemosphere*. 257 (2020) 127123.
- [11] C. Martínez, S. Vilariño, M.I. Fernández, J. Faria, J.A. Santaballa, Mechanism of degradation of ketoprofen by heterogeneous photocatalysis in aqueous solution, *Applied Catalysis B: Environmental*. 142 (2013) 633–646.
- [12] L. Hykrdová, O. Bajt, J. Jirkovský, Mechanism and kinetics of photochemical transformation of ketoprofen and its degradation intermediates, *Journal of Hazardous Materials*. 353 (2018) 70–79.
